# Supplementary material for: Functionally distinct Purkinje cell types show temporal precision in encoding locomotion
Source: PubMed Central journal article supplement — Proc Natl Acad Sci U S A. 2020 Jul 6;117(29):17330–7. doi: 10.1073/pnas.2005633117 (PMC7382291; doi:10.1073/pnas.2005633117), 2020-07-06
Supplement: pnas.2005633117.sapp.pdf [file pnas.2005633117.sapp.pdf]

# PNAS

[www.pnas.org](http://www.pnas.org)

Supplementary Information for

**Functionally-distinct Purkinje cell types show temporal precision in encoding locomotion**

Weipang Chang, Andrea Pedroni, Victoria Hohendorf, Stefania Giacomello, Masahiko Hibi, Reinhard W. Köster and Konstantinos Ampatzis

Konstantinos Ampatzis

Email: [Konstantinos.Ampatzis@ki.se](mailto:Konstantinos.Ampatzis@ki.se)

**This PDF file includes:**

Figures S1 to S8  
Tables S1  
Legends for Movies S1

**Other supplementary materials for this manuscript include the following:**

Movies S1

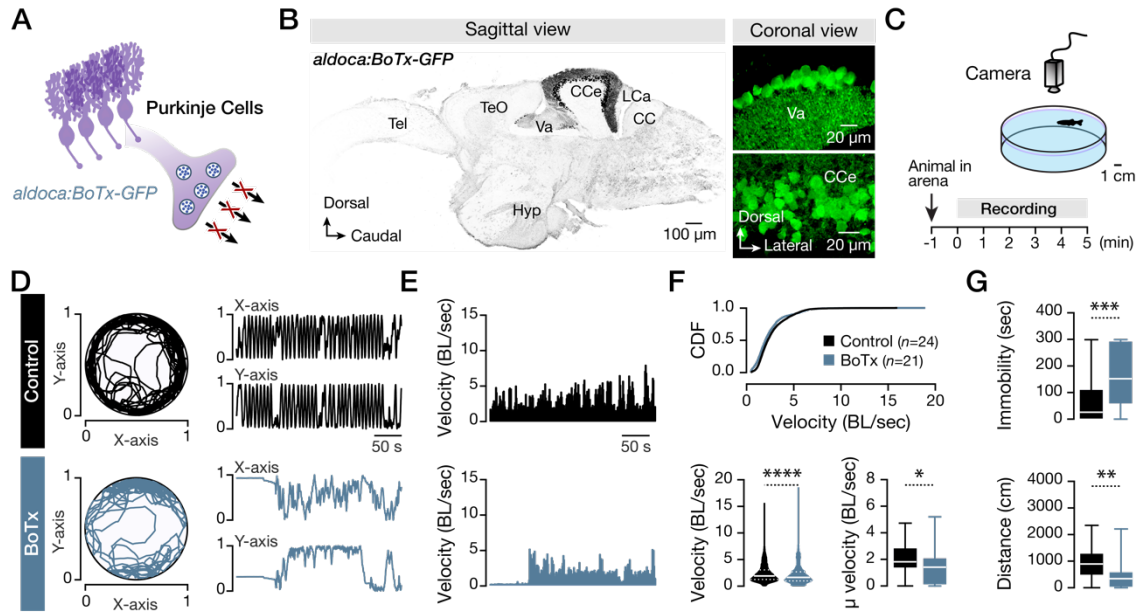

**Fig. S1. Adult zebrafish Purkinje cell silencing disrupts locomotor performance.** (A) A transgenic animal line in which all and only the Purkinje cells encode Botulinum toxin (BoTx) was used. (B) Sagittal view of the adult zebrafish brain showing the specificity of the transgenic zebrafish line. Microphotographs acquired from the adult zebrafish valvula (Va) and corpus (CCe) cerebelli showing the expression of the BoTx (GFP+; green) in the Purkinje cell population. (C) Experimental setup for recording and evaluating the adult zebrafish locomotor behavior under an open field test. (D) Sample traces of recorded movements of control (WT; black) and BoTx (*aldoca:BoTx-GFP*; Cyan) zebrafish, followed by an analysis of the body displacement with respect to X and Y axis during the open field test (duration 5 min). The BoTx animals exhibited erratic locomotion compared to the smooth movements observed in the control animals. (E, F) Traces and analysis of normalized velocity show that silencing Purkinje cells in *aldoca:BoTx-GFP* (Cyan) causes slow locomotion (velocity:  $P < 0.0001$ , unpaired *t*-test; average velocity:  $P = 0.045$ , unpaired *t*-test) during the open field test. (G) Quantification of the swimming parameters showing that the immobility time ( $P = 0.001$ , unpaired *t*-test), and the total distance traveled ( $P = 0.007$ , unpaired *t*-test), were significantly different between the control (black) and the *aldoca:BoTx-GFP* (Cyan) animals. BoTx, Botulinum toxin; CC, crista cerebellaris; CCe, corpus cerebelli; CDF, cumulative distribution frequencies; Hyp, hypothalamus; LCa, lobus caudalis cerebelli; Tel, telencephalon; TeO, tectum opticum; Va, valvular cerebelli;  $\mu$ , mean. Data are presented as box or violin plots showing the median with 25/75 percentile (box and line) and minimum–maximum (whiskers). \* $P < 0.05$ ; \*\* $P < 0.01$ ; \*\*\* $P < 0.001$ ; \*\*\*\* $P < 0.0001$ ; ns, not significant. For detailed statistics, see *SI Appendix*, Table S1.

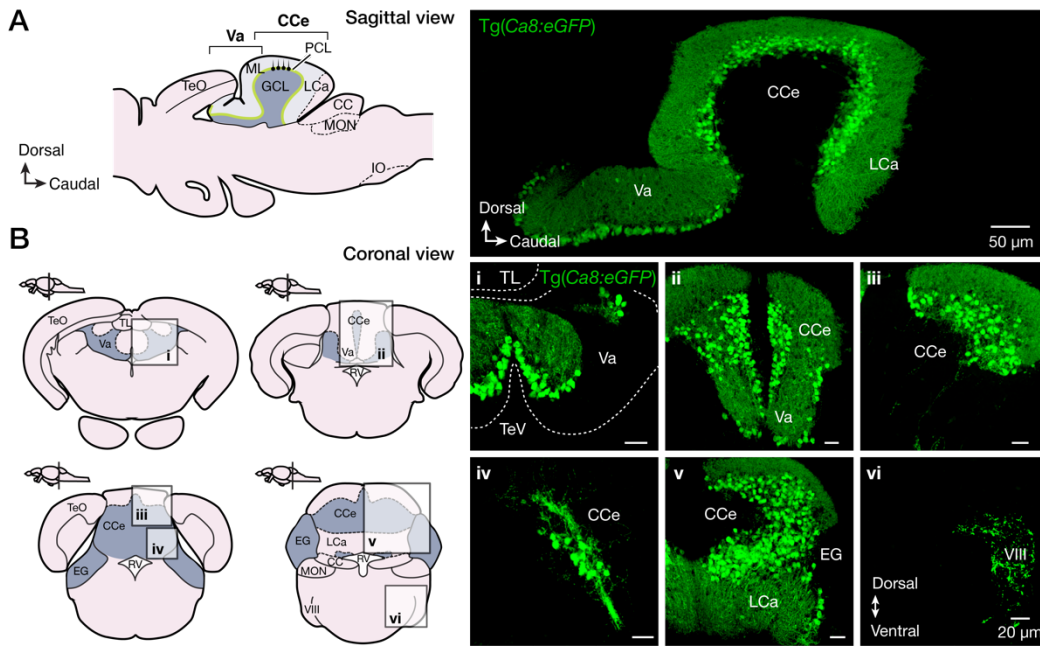

**Fig. S2. Expression pattern of *Ca8:eGFP* in the adult zebrafish brain.** (A-B) Sagittal and coronal sections are showing the specificity of the eGFP expression in all Purkinje cells (green) of the adult zebrafish cerebellum. CC, crista cerebellaris, CCe, corpus cerebelli; EG, eminentia granularis; GCL, granule cell layer; IO, oliva inferior; LCa, lobus caudalis cerebelli; ML, molecular layer; MON, medial octavolateralis nucleus; PCL, Purkinje cell layer; RV, rhombencephalic ventricle; TeO, tectum opticum; TeV, tectal ventricle; Va, valvular cerebelli; VIII, octaval nerve.

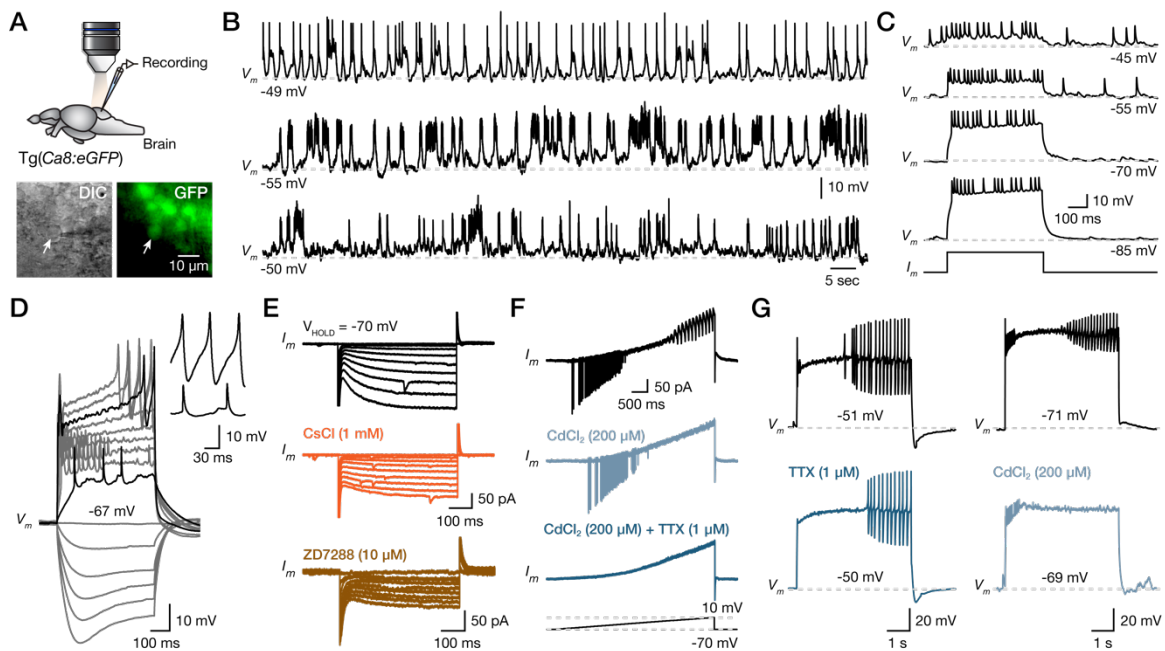

**Fig. S3. Common physiological properties of the Purkinje cells.** (A) *Ex-vivo* setup of an isolated intact brain from the Tg(Ca8:eGFP) line allows whole-cell patch-clamp recordings of Purkinje cells. Arrows indicate the recorded cell. (B) Sample traces showing the intense and variable spontaneous activity of three different Purkinje cells recorded in the adult zebrafish cerebellum. (C) Application of a bias hyperpolarization current eliminates the spontaneous activity without affecting the Purkinje cell firing pattern induced by a depolarized current step injection. (D) Step current injections reveal the common Purkinje cell properties (sag potential, sodium spikes, calcium spikes). Magnification of the calcium-based (top) and sodium-based (bottom) spikes showing noticeable differences in the amplitude and duration. (E) Voltage-clamp recordings show inward current reduced by *I<sub>h</sub>* blockers (CsCl, ZD7288). (F) Voltage-clamp ramp recordings show sodium (blocked by TTX) and calcium (blocked by CdCl<sub>2</sub>) spikes. (G) Current-clamp recordings show the elimination of the sodium spikes after the application of TTX and the calcium spikes with CdCl<sub>2</sub>. CdCl<sub>2</sub>, calcium chloride; CsCl, cesium chloride; DIC, differential interference contrast; GFP, green fluorescent protein; TTX, tetrodotoxin.

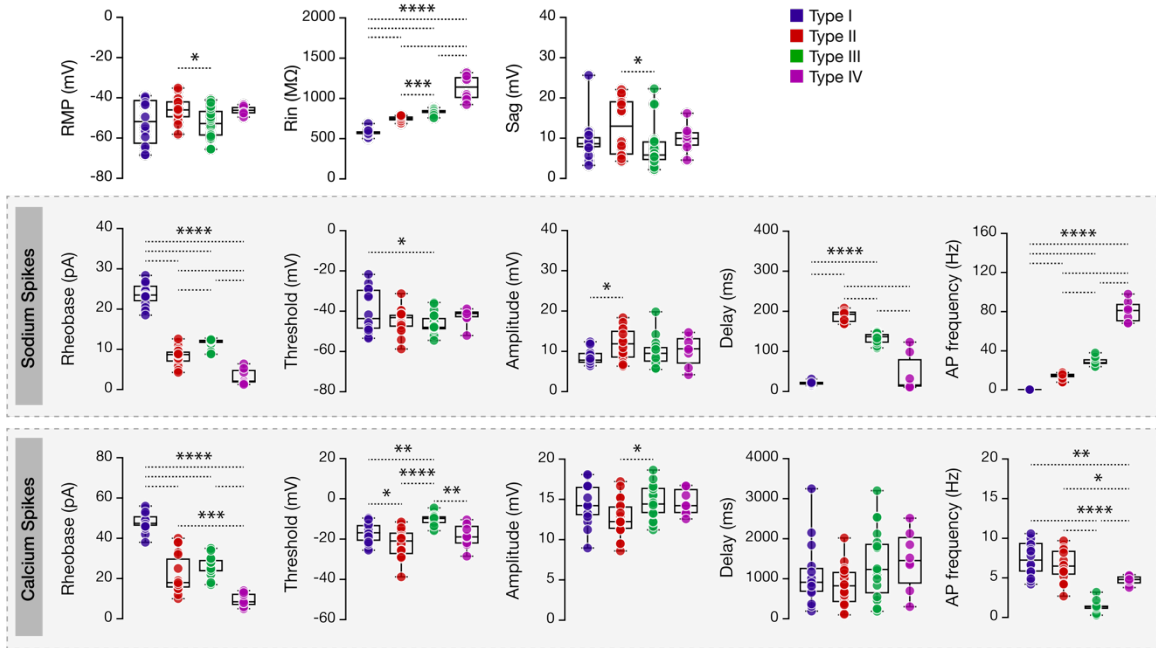

**Fig. S4. Physiological features of the adult zebrafish Purkinje cells based on the firing pattern types that are categorized.** Detailed analysis of the cellular and electrical properties of all Purkinje cell types. (Top panel) General properties. (Middle panel) Features of the sodium-based spikes. (Bottom panel) Properties obtained from calcium-based spikes. AP, action potential; RMP, resting membrane potential; Rin, input resistance. Data are presented as means  $\pm$  s.e.m. and as box plots showing the median with 25/75 percentile (box and line) and minimum–maximum (whiskers). \* $P < 0.05$ ; \*\* $P < 0.01$ ; \*\*\* $P < 0.001$ ; \*\*\*\* $P < 0.0001$ . For detailed statistics, see *SI Appendix*, Table S1.

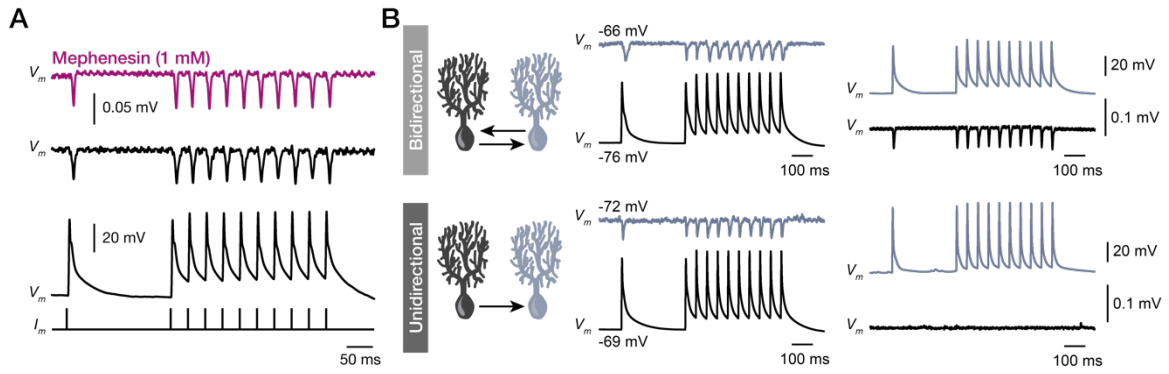

**Fig. S5. Purkinje cell synaptic connections.** (A) IPSPs induced between connected Purkinje cells do not attenuate in the presence of the polysynaptic blocker mephenesin (1 mM), suggesting that are monosynaptically connected. (B) Sample traces of paired recordings show bidirectional and unidirectional connections between Purkinje cells.

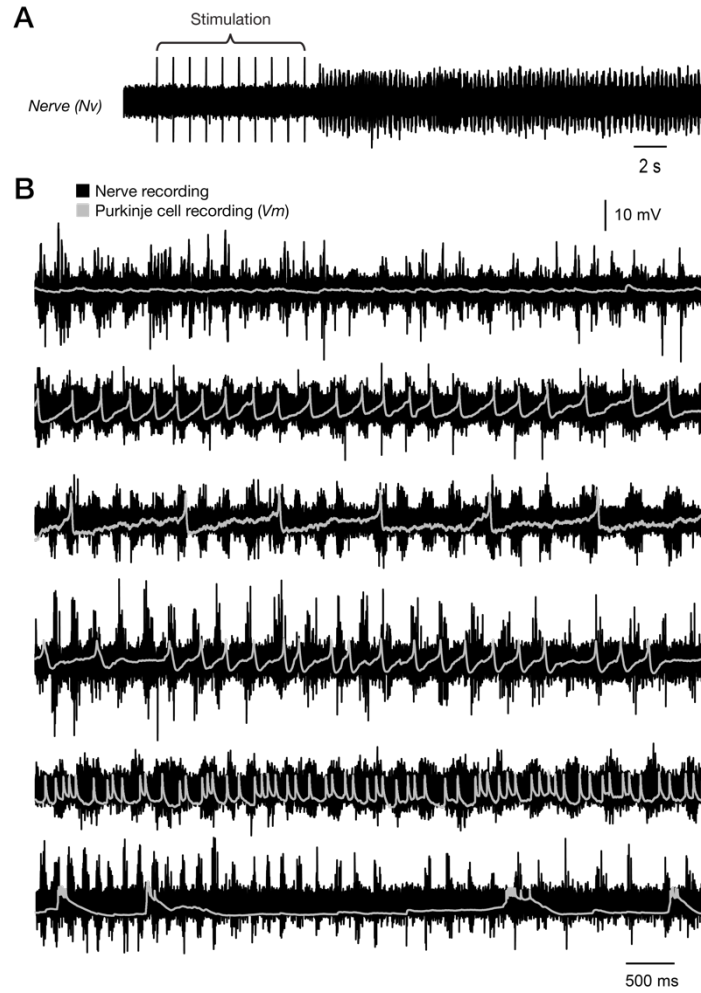

**Fig. S6. Purkinje cell firing during the execution of the spinal motor program.** (A) Electrical stimulation pulses (10 pulses at 1 Hz) in the *ex-vivo* adult zebrafish preparation (Fig. 3A) induce a long-lasting swimming episode. (B) Sample traces recordings obtained from six different Purkinje cells showing a locomotor related activity (current-clamp) of the Purkinje cell (gray traces) superimposed with the corresponding motor nerve recording (black traces).

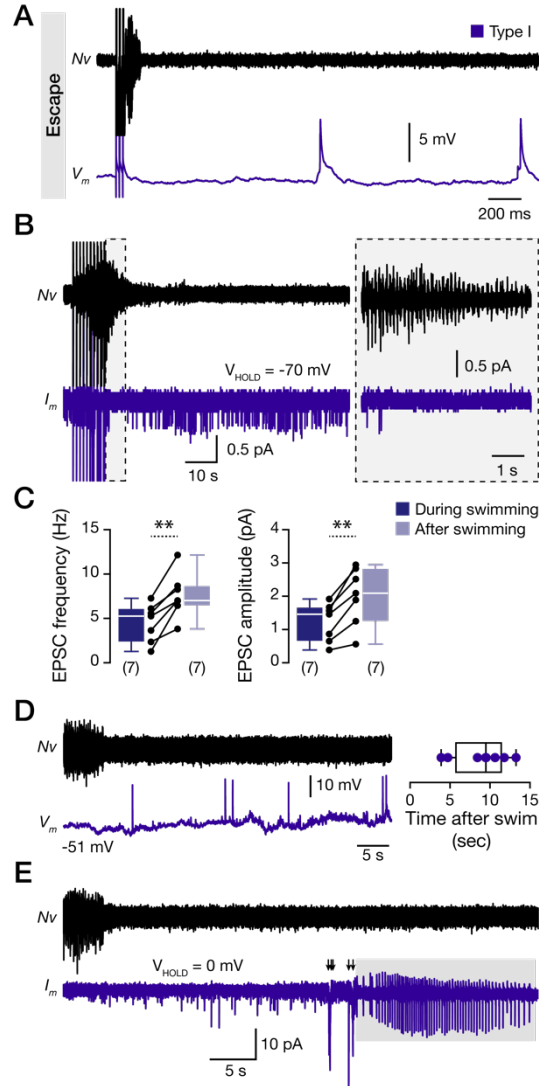

**Fig. S7. Type I Purkinje cells are inactive during locomotion and escape.** (A) Strong electrical stimulation pulses induced an escape response, but no firing observed from the type I Purkinje cell. (B) Voltage-clamp recordings show a significant reduction of excitatory inputs (EPSCs) in type I Purkinje cells during locomotion. (C) Quantification shows that after locomotion, the EPSC frequencies ( $P=0.0014$ , paired Student's  $t$ -test) and the EPSC amplitudes ( $P=0.0014$ , paired Student's  $t$ -test) increase significantly. (D) current-clamp recordings show a lack of firing from type I Purkinje cells during locomotion. All type I Purkinje cells discharge after fictive locomotion has ended. Plot of the first action potential after locomotion ( $n=7$  cells). (E) Voltage-clamp recordings show the reduction of the EPSCs during locomotion, the increased activity observed after locomotion generating few sodium spikes (black arrows), and numerous calcium-based spikes (shaded gray area). EPSC, excitatory postsynaptic current. Data are presented as box plots showing the median with 25/75 percentile (box and line) and minimum–maximum (whiskers).  $**P<0.01$ . For detailed statistics, see *SI Appendix*, Table S1.



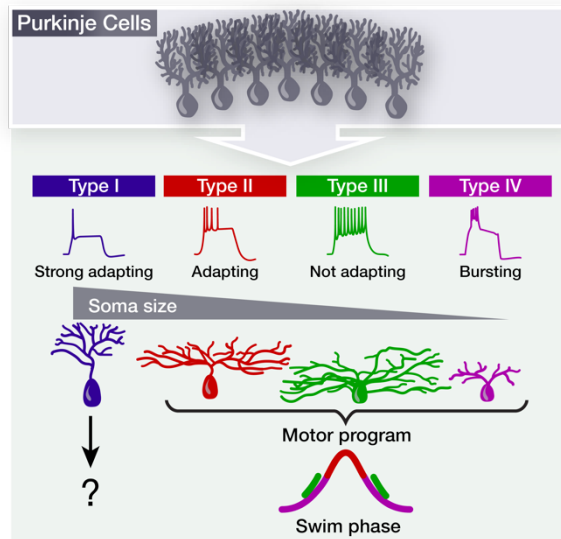

**Fig. S8. Schematic summary of the significant findings and the proposed model for the Purkinje contribution in locomotion.** Purkinje cells in the adult zebrafish cerebellum constitute four physiological and morphological distinct types, where the soma size can predict their type. Type II, III, and IV of Purkinje cells have a unique phase-locked activity during the locomotor cycle. Type I Purkinje cells are not active during locomotion, and they may encode the overall motor performance and might be necessary for motor learning.

**Movie S1. 3-D Purkinje cell morphology.** Reconstructed neurobiotin-filled Purkinje cell showing a 3-dimensional morphology.

**Table S1.** Detailed statistics.

| Figure                           | Statistics                                                                                                                                                                                              | Result                                                                                                                                                                                                                                    | Post-hoc Test                   | Comparison       | Significance | P value            |
|----------------------------------|---------------------------------------------------------------------------------------------------------------------------------------------------------------------------------------------------------|-------------------------------------------------------------------------------------------------------------------------------------------------------------------------------------------------------------------------------------------|---------------------------------|------------------|--------------|--------------------|
| <b>1B</b>                        | Descriptive                                                                                                                                                                                             | Soma sizes: $54.34 \pm 0.723$ ( $n = 707$ Purkinje cells)                                                                                                                                                                                 |                                 |                  |              |                    |
| <b>1F</b>                        | One-way ANOVA                                                                                                                                                                                           | $F_{(3, 60)} = 56.89$ ,<br>$P < 0.0001$                                                                                                                                                                                                   | Tukey's test                    | Type I-Type II   | ****         | $P_{adj} < 0.0001$ |
|                                  |                                                                                                                                                                                                         |                                                                                                                                                                                                                                           |                                 | Type I-Type III  | ****         | $P_{adj} < 0.0001$ |
|                                  |                                                                                                                                                                                                         |                                                                                                                                                                                                                                           |                                 | Type I-Type IV   | ****         | $P_{adj} < 0.0001$ |
|                                  |                                                                                                                                                                                                         |                                                                                                                                                                                                                                           |                                 | Type II-Type III | ns           | $P_{adj} = 0.2818$ |
|                                  |                                                                                                                                                                                                         |                                                                                                                                                                                                                                           |                                 | Type II-Type IV  | ****         | $P_{adj} < 0.0001$ |
|                                  | Type III-Type IV                                                                                                                                                                                        | **                                                                                                                                                                                                                                        | $P_{adj} = 0.005$               |                  |              |                    |
| Descriptive                      | Type I ( $n = 16$ Purkinje): $11.33 \pm 0.4527$<br>Type II ( $n = 20$ Purkinje): $7.74 \pm 0.2521$<br>Type III ( $n = 20$ Purkinje): $7.04 \pm 0.174$<br>Type IV ( $n = 8$ Purkinje): $5.25 \pm 0.3145$ |                                                                                                                                                                                                                                           |                                 |                  |              |                    |
| <b>1N</b><br>Dendritic terminals | One-way ANOVA                                                                                                                                                                                           | $F_{(3, 19)} = 0.0411$                                                                                                                                                                                                                    |                                 |                  | ns           | $P = 0.9885$       |
|                                  | Descriptive                                                                                                                                                                                             | Type I ( $n = 6$ Purkinje): $13.83 \pm 1.701$<br>Type II ( $n = 5$ Purkinje): $14 \pm 1.483$<br>Type III ( $n = 9$ Purkinje): $14.22 \pm 1.011$<br>Type IV ( $n = 3$ Purkinje): $14.67 \pm 2.404$                                         |                                 |                  |              |                    |
| <b>1N</b><br>Dendritic area      | One-way ANOVA                                                                                                                                                                                           | $F_{(3, 19)} = 9.733$ ,<br>$P = 0.0004$                                                                                                                                                                                                   | Tukey's test                    | Type I-Type II   | ns           | $P_{adj} = 0.3046$ |
|                                  |                                                                                                                                                                                                         |                                                                                                                                                                                                                                           |                                 | Type I-Type III  | ***          | $P_{adj} = 0.0006$ |
|                                  |                                                                                                                                                                                                         |                                                                                                                                                                                                                                           |                                 | Type I-Type IV   | ns           | $P_{adj} = 0.9993$ |
|                                  |                                                                                                                                                                                                         |                                                                                                                                                                                                                                           |                                 | Type II-Type III | ns           | $P_{adj} = 0.0688$ |
|                                  |                                                                                                                                                                                                         |                                                                                                                                                                                                                                           |                                 | Type II-Type IV  | ns           | $P_{adj} = 0.5300$ |
|                                  | Type III-Type IV                                                                                                                                                                                        | **                                                                                                                                                                                                                                        | $P_{adj} = 0.0072$              |                  |              |                    |
| Descriptive                      | Type I ( $n = 6$ Purkinje): $1218 \pm 414.8$<br>Type II ( $n = 5$ Purkinje): $3060 \pm 598.5$<br>Type III ( $n = 9$ Purkinje): $5560 \pm 762.4$<br>Type IV ( $n = 3$ Purkinje): $1363 \pm 160.7$        |                                                                                                                                                                                                                                           |                                 |                  |              |                    |
| <b>1N</b><br>Dendritic length    | One-way ANOVA                                                                                                                                                                                           | $F_{(3, 19)} = 21.18$ ,<br>$P < 0.0001$                                                                                                                                                                                                   | Tukey's test                    | Type I-Type II   | *            | $P_{adj} = 0.0201$ |
|                                  |                                                                                                                                                                                                         |                                                                                                                                                                                                                                           |                                 | Type I-Type III  | ****         | $P_{adj} < 0.0001$ |
|                                  |                                                                                                                                                                                                         |                                                                                                                                                                                                                                           |                                 | Type I-Type IV   | ns           | $P_{adj} = 0.9834$ |
|                                  |                                                                                                                                                                                                         |                                                                                                                                                                                                                                           |                                 | Type II-Type III | *            | $P_{adj} = 0.0312$ |
|                                  |                                                                                                                                                                                                         |                                                                                                                                                                                                                                           |                                 | Type II-Type IV  | *            | $P_{adj} = 0.0311$ |
|                                  | Type III-Type IV                                                                                                                                                                                        | ****                                                                                                                                                                                                                                      | $P_{adj} < 0.0001$              |                  |              |                    |
| Descriptive                      | Type I ( $n = 6$ Purkinje): $309.4 \pm 55.51$<br>Type II ( $n = 5$ Purkinje): $536 \pm 49.33$<br>Type III ( $n = 9$ Purkinje): $731.3 \pm 39.09$<br>Type IV ( $n = 3$ Purkinje): $280 \pm 10.95$        |                                                                                                                                                                                                                                           |                                 |                  |              |                    |
| <b>2C</b><br>Connectivity        | Descriptive                                                                                                                                                                                             | Within types ( $n = 20$ ): 70%<br>Between types ( $n = 21$ ): 80.95%                                                                                                                                                                      |                                 |                  |              |                    |
| <b>2C</b><br>Amplitude           | Unpaired <i>t</i> -test                                                                                                                                                                                 | $t = 1.335$ , $df = 29$ (Two-tailed)                                                                                                                                                                                                      | Within types -<br>Between types |                  | ns           | $P = 0.1924$       |
|                                  | Descriptive                                                                                                                                                                                             | Within types ( $n = 14$ ): $0.042 \pm 0.0019$<br>Between types ( $n = 17$ ): $0.038 \pm 0.0023$                                                                                                                                           |                                 |                  |              |                    |
| <b>2C</b><br>Distance            | Two-way ANOVA                                                                                                                                                                                           | <b>Connectivity factor:</b><br>Connected vs not-connected: $F_{(1, 37)} = 3.941$                                                                                                                                                          |                                 |                  | ns           | $P = 0.0546$       |
|                                  |                                                                                                                                                                                                         | <b>Types factor:</b><br>Within vs between types: $F_{(1, 37)} = 0.568$                                                                                                                                                                    |                                 |                  | ns           | $P = 0.4555$       |
|                                  |                                                                                                                                                                                                         | Interaction: $F_{(1, 37)} = 0.0034$                                                                                                                                                                                                       |                                 |                  | ns           | $P = 0.9533$       |
|                                  | Descriptive                                                                                                                                                                                             | <b>Connected:</b><br>Within types ( $n = 14$ ): $30.73 \pm 3.840$<br>Between types ( $n = 17$ ): $27.86 \pm 1.903$<br><b>Not-Connected:</b><br>Within types ( $n = 6$ ): $39.15 \pm 4.186$<br>Between types ( $n = 4$ ): $35.8 \pm 5.764$ |                                 |                  |              |                    |
| <b>2G</b>                        | Descriptive                                                                                                                                                                                             | Within types ( $n = 14$ ): 28.57%<br>Between types ( $n = 17$ ): 0%                                                                                                                                                                       |                                 |                  |              |                    |

|                              |                                                                                                                                                                                                              |                                                                                                     |                    |                  |              |                    |
|------------------------------|--------------------------------------------------------------------------------------------------------------------------------------------------------------------------------------------------------------|-----------------------------------------------------------------------------------------------------|--------------------|------------------|--------------|--------------------|
| <b>3C</b>                    | One-way ANOVA                                                                                                                                                                                                | $F_{(3, 33)} = 8.563$ ,<br>$P = 0.0002$                                                             | Tukey's test       | Type I-Type II   | **           | $P_{adj} = 0.0038$ |
|                              |                                                                                                                                                                                                              |                                                                                                     |                    | Type I-Type III  | **           | $P_{adj} = 0.0073$ |
|                              |                                                                                                                                                                                                              |                                                                                                     |                    | Type I-Type IV   | ***          | $P_{adj} = 0.0001$ |
|                              |                                                                                                                                                                                                              |                                                                                                     |                    | Type II-Type III | ns           | $P_{adj} = 0.9914$ |
|                              |                                                                                                                                                                                                              |                                                                                                     |                    | Type II-Type IV  | ns           | $P_{adj} = 0.2589$ |
|                              | Type III-Type IV                                                                                                                                                                                             | ns                                                                                                  | $P_{adj} = 0.1713$ |                  |              |                    |
| Descriptive                  | Type I ( $n = 7$ Purkinje): $0.00 \pm 0.00$<br>Type II ( $n = 12$ Purkinje): $0.9021 \pm 0.1458$<br>Type III ( $n = 12$ Purkinje): $0.8422 \pm 0.1725$<br>Type IV ( $n = 6$ Purkinje): $1.378 \pm 0.2432$    |                                                                                                     |                    |                  |              |                    |
| <b>3D</b>                    | One-way ANOVA                                                                                                                                                                                                | $F_{(3, 33)} = 19.57$ ,<br>$P < 0.0001$                                                             | Tukey's test       | Type I-Type II   | ****         | $P_{adj} < 0.0001$ |
|                              |                                                                                                                                                                                                              |                                                                                                     |                    | Type I-Type III  | ****         | $P_{adj} < 0.0001$ |
|                              |                                                                                                                                                                                                              |                                                                                                     |                    | Type I-Type IV   | ns           | $P_{adj} = 0.9656$ |
|                              |                                                                                                                                                                                                              |                                                                                                     |                    | Type II-Type III | ns           | $P_{adj} = 0.5751$ |
|                              |                                                                                                                                                                                                              |                                                                                                     |                    | Type II-Type IV  | ****         | $P_{adj} < 0.0001$ |
|                              | Type III-Type IV                                                                                                                                                                                             | ***                                                                                                 | $P_{adj} = 0.0006$ |                  |              |                    |
| Descriptive                  | Type I ( $n = 7$ Purkinje): $0.044 \pm 0.223$<br>Type II ( $n = 12$ Purkinje): $4.878 \pm 0.669$<br>Type III ( $n = 12$ Purkinje): $4.023 \pm 0.425$<br>Type IV ( $n = 6$ Purkinje): $0.466 \pm 0.234$       |                                                                                                     |                    |                  |              |                    |
| <b>Supplementary Figures</b> |                                                                                                                                                                                                              |                                                                                                     |                    |                  |              |                    |
| <b>S1F</b><br>Velocity       | Unpaired <i>t</i> -test                                                                                                                                                                                      | $t = 7.432$ , $df = 8685$ (Two-tailed)                                                              | Control - BoTx     | ****             | $P < 0.0001$ |                    |
|                              | Descriptive                                                                                                                                                                                                  | Control ( $n = 24$ zebrafish): $2.389 \pm 0.0215$<br>BoTx ( $n = 21$ zebrafish): $2.111 \pm 0.0309$ |                    |                  |              |                    |
| <b>S1F</b><br>$\mu$ velocity | Unpaired <i>t</i> -test                                                                                                                                                                                      | $t = 2.112$ , $df = 43$ (Two-tailed)                                                                | Control - BoTx     | *                | $P = 0.0405$ |                    |
|                              | Descriptive                                                                                                                                                                                                  | Control ( $n = 24$ zebrafish): $2.222 \pm 0.2446$<br>BoTx ( $n = 21$ zebrafish): $1.438 \pm 0.2815$ |                    |                  |              |                    |
| <b>S1G</b><br>Immobility     | Unpaired <i>t</i> -test                                                                                                                                                                                      | $t = 3.543$ , $df = 43$ (Two-tailed)                                                                | Control - BoTx     | ***              | $P = 0.001$  |                    |
|                              | Descriptive                                                                                                                                                                                                  | Control ( $n = 24$ zebrafish): $59.13 \pm 15.76$<br>BoTx ( $n = 21$ zebrafish): $160.6 \pm 24.77$   |                    |                  |              |                    |
| <b>S1G</b><br>Distance       | Unpaired <i>t</i> -test                                                                                                                                                                                      | $t = 2.818$ , $df = 43$ (Two-tailed)                                                                | Control - BoTx     | **               | $P = 0.0073$ |                    |
|                              | Descriptive                                                                                                                                                                                                  | Control ( $n = 24$ zebrafish): $910 \pm 113.3$<br>BoTx ( $n = 21$ zebrafish): $453.1 \pm 115.2$     |                    |                  |              |                    |
| <b>S4</b><br>RMP             | One-way ANOVA                                                                                                                                                                                                | $F_{(3, 60)} = 4.109$ ,<br>$P = 0.0102$                                                             | Tukey's test       | Type I-Type II   | ns           | $P_{adj} = 0.1172$ |
|                              |                                                                                                                                                                                                              |                                                                                                     |                    | Type I-Type III  | ns           | $P_{adj} = 0.9105$ |
|                              |                                                                                                                                                                                                              |                                                                                                     |                    | Type I-Type IV   | ns           | $P_{adj} = 0.3721$ |
|                              |                                                                                                                                                                                                              |                                                                                                     |                    | Type II-Type III | *            | $P_{adj} = 0.0148$ |
|                              |                                                                                                                                                                                                              |                                                                                                     |                    | Type II-Type IV  | ns           | $P_{adj} = 0.9991$ |
|                              | Type III-Type IV                                                                                                                                                                                             | ns                                                                                                  | $P_{adj} = 0.1310$ |                  |              |                    |
| Descriptive                  | Type I ( $n = 16$ Purkinje): $-51.76 \pm 2.759$<br>Type II ( $n = 20$ Purkinje): $-45.82 \pm 1.299$<br>Type III ( $n = 20$ Purkinje): $-53.50 \pm 1.746$<br>Type IV ( $n = 8$ Purkinje): $-46.26 \pm 0.7845$ |                                                                                                     |                    |                  |              |                    |
| <b>S4</b><br>Rin             | One-way ANOVA                                                                                                                                                                                                | $F_{(3, 60)} = 150.9$ ,<br>$P < 0.0001$                                                             | Tukey's test       | Type I-Type II   | ****         | $P_{adj} < 0.0001$ |
|                              |                                                                                                                                                                                                              |                                                                                                     |                    | Type I-Type III  | ****         | $P_{adj} < 0.0001$ |
|                              |                                                                                                                                                                                                              |                                                                                                     |                    | Type I-Type IV   | ****         | $P_{adj} < 0.0001$ |
|                              |                                                                                                                                                                                                              |                                                                                                     |                    | Type II-Type III | ***          | $P_{adj} = 0.0002$ |
|                              |                                                                                                                                                                                                              |                                                                                                     |                    | Type II-Type IV  | ****         | $P_{adj} < 0.0001$ |
|                              | Type III-Type IV                                                                                                                                                                                             | ****                                                                                                | $P_{adj} < 0.0001$ |                  |              |                    |
| Descriptive                  | Type I ( $n = 16$ Purkinje): $576.0 \pm 10.54$<br>Type II ( $n = 20$ Purkinje): $747.7 \pm 7.095$<br>Type III ( $n = 20$ Purkinje): $835.7 \pm 7.799$<br>Type IV ( $n = 8$ Purkinje): $1134 \pm 54.03$       |                                                                                                     |                    |                  |              |                    |

|                                         |               |                                                                                                                                                                                                             |              |                  |      |                    |
|-----------------------------------------|---------------|-------------------------------------------------------------------------------------------------------------------------------------------------------------------------------------------------------------|--------------|------------------|------|--------------------|
| <b>S4</b><br>Sag                        | One-way ANOVA | $F_{(3, 60)} = 2.576,$<br>$P = 0.0621$                                                                                                                                                                      | Tukey's test | Type I-Type II   | ns   | $P_{adj} = 0.2553$ |
|                                         |               |                                                                                                                                                                                                             |              | Type I-Type III  | ns   | $P_{adj} = 0.9037$ |
|                                         |               |                                                                                                                                                                                                             |              | Type I-Type IV   | ns   | $P_{adj} = 0.9903$ |
|                                         |               |                                                                                                                                                                                                             |              | Type II-Type III | *    | $P_{adj} = 0.0437$ |
|                                         |               |                                                                                                                                                                                                             |              | Type II-Type IV  | ns   | $P_{adj} = 0.6416$ |
|                                         |               |                                                                                                                                                                                                             |              | Type III-Type IV | ns   | $P_{adj} = 0.8257$ |
|                                         | Descriptive   | Type I ( $n = 16$ Purkinje): $9.28 \pm 1.225$<br>Type II ( $n = 20$ Purkinje): $12.84 \pm 1.552$<br>Type III ( $n = 20$ Purkinje): $7.979 \pm 1.245$<br>Type IV ( $n = 8$ Purkinje): $10.03 \pm 1.189$      |              |                  |      |                    |
| <b>S4</b><br>Sodium<br>APs<br>rheobase  | One-way ANOVA | $F_{(3, 60)} = 230.6,$<br>$P < 0.0001$                                                                                                                                                                      | Tukey's test | Type I-Type II   | **** | $P_{adj} < 0.0001$ |
|                                         |               |                                                                                                                                                                                                             |              | Type I-Type III  | **** | $P_{adj} < 0.0001$ |
|                                         |               |                                                                                                                                                                                                             |              | Type I-Type IV   | **** | $P_{adj} < 0.0001$ |
|                                         |               |                                                                                                                                                                                                             |              | Type II-Type III | **** | $P_{adj} < 0.0001$ |
|                                         |               |                                                                                                                                                                                                             |              | Type II-Type IV  | **** | $P_{adj} < 0.0001$ |
|                                         |               |                                                                                                                                                                                                             |              | Type III-Type IV | **** | $P_{adj} < 0.0001$ |
|                                         | Descriptive   | Type I ( $n = 16$ Purkinje): $23.69 \pm 0.6862$<br>Type II ( $n = 20$ Purkinje): $8.315 \pm 0.5075$<br>Type III ( $n = 20$ Purkinje): $11.73 \pm 0.276$<br>Type IV ( $n = 8$ Purkinje): $3.088 \pm 0.6932$  |              |                  |      |                    |
| <b>S4</b><br>Sodium<br>APs<br>threshold | One-way ANOVA | $F_{(3, 60)} = 2.789,$<br>$P = 0.0482$                                                                                                                                                                      | Tukey's test | Type I-Type II   | ns   | $P_{adj} = 0.1844$ |
|                                         |               |                                                                                                                                                                                                             |              | Type I-Type III  | *    | $P_{adj} = 0.0354$ |
|                                         |               |                                                                                                                                                                                                             |              | Type I-Type IV   | ns   | $P_{adj} = 0.8149$ |
|                                         |               |                                                                                                                                                                                                             |              | Type II-Type III | ns   | $P_{adj} = 0.8609$ |
|                                         |               |                                                                                                                                                                                                             |              | Type II-Type IV  | ns   | $P_{adj} = 0.8865$ |
|                                         |               |                                                                                                                                                                                                             |              | Type III-Type IV | ns   | $P_{adj} = 0.5546$ |
|                                         | Descriptive   | Type I ( $n = 16$ Purkinje): $-39.76 \pm 2.724$<br>Type II ( $n = 20$ Purkinje): $-44.62 \pm 1.304$<br>Type III ( $n = 20$ Purkinje): $-46.38 \pm 1.109$<br>Type IV ( $n = 8$ Purkinje): $-42.46 \pm 1.483$ |              |                  |      |                    |
| <b>S4</b><br>Sodium<br>APs<br>amplitude | One-way ANOVA | $F_{(3, 60)} = 2.863,$<br>$P = 0.0442$                                                                                                                                                                      | Tukey's test | Type I-Type II   | *    | $P_{adj} = 0.0295$ |
|                                         |               |                                                                                                                                                                                                             |              | Type I-Type III  | ns   | $P_{adj} = 0.7314$ |
|                                         |               |                                                                                                                                                                                                             |              | Type I-Type IV   | ns   | $P_{adj} = 0.6509$ |
|                                         |               |                                                                                                                                                                                                             |              | Type II-Type III | ns   | $P_{adj} = 0.2264$ |
|                                         |               |                                                                                                                                                                                                             |              | Type II-Type IV  | ns   | $P_{adj} = 0.7025$ |
|                                         |               |                                                                                                                                                                                                             |              | Type III-Type IV | ns   | $P_{adj} = 0.9813$ |
|                                         | Descriptive   | Type I ( $n = 16$ Purkinje): $8.575 \pm 0.4988$<br>Type II ( $n = 20$ Purkinje): $11.68 \pm 0.842$<br>Type III ( $n = 20$ Purkinje): $9.699 \pm 0.7432$<br>Type IV ( $n = 8$ Purkinje): $10.21 \pm 1.289$   |              |                  |      |                    |
| <b>S4</b><br>Sodium<br>APs<br>delay     | One-way ANOVA | $F_{(3, 60)} = 276.6,$<br>$P < 0.0001$                                                                                                                                                                      | Tukey's test | Type I-Type II   | **** | $P_{adj} < 0.0001$ |
|                                         |               |                                                                                                                                                                                                             |              | Type I-Type III  | **** | $P_{adj} < 0.0001$ |
|                                         |               |                                                                                                                                                                                                             |              | Type I-Type IV   | ns   | $P_{adj} = 0.1050$ |
|                                         |               |                                                                                                                                                                                                             |              | Type II-Type III | **** | $P_{adj} < 0.0001$ |
|                                         |               |                                                                                                                                                                                                             |              | Type II-Type IV  | **** | $P_{adj} < 0.0001$ |
|                                         |               |                                                                                                                                                                                                             |              | Type III-Type IV | **** | $P_{adj} < 0.0001$ |
|                                         | Descriptive   | Type I ( $n = 16$ Purkinje): $20.75 \pm 0.9598$<br>Type II ( $n = 20$ Purkinje): $188.3 \pm 3.184$<br>Type III ( $n = 20$ Purkinje): $133.0 \pm 3.054$<br>Type IV ( $n = 8$ Purkinje): $39.85 \pm 15.86$    |              |                  |      |                    |
| <b>S4</b><br>Sodium<br>APs<br>frequency | One-way ANOVA | $F_{(3, 60)} = 562.9,$<br>$P < 0.0001$                                                                                                                                                                      | Tukey's test | Type I-Type II   | **** | $P_{adj} < 0.0001$ |
|                                         |               |                                                                                                                                                                                                             |              | Type I-Type III  | **** | $P_{adj} < 0.0001$ |
|                                         |               |                                                                                                                                                                                                             |              | Type I-Type IV   | **** | $P_{adj} < 0.0001$ |
|                                         |               |                                                                                                                                                                                                             |              | Type II-Type III | **** | $P_{adj} < 0.0001$ |
|                                         |               |                                                                                                                                                                                                             |              | Type II-Type IV  | **** | $P_{adj} < 0.0001$ |
|                                         |               |                                                                                                                                                                                                             |              | Type III-Type IV | **** | $P_{adj} < 0.0001$ |
|                                         | Descriptive   | Type I ( $n = 16$ Purkinje): $0.5 \pm 0.0$<br>Type II ( $n = 20$ Purkinje): $14.30 \pm 0.7578$<br>Type III ( $n = 20$ Purkinje): $29.20 \pm 0.9222$<br>Type IV ( $n = 8$ Purkinje): $80.50 \pm 3.698$       |              |                  |      |                    |

|                                       |               |                                                                                                                                                                                                              |                         |                  |              |                    |
|---------------------------------------|---------------|--------------------------------------------------------------------------------------------------------------------------------------------------------------------------------------------------------------|-------------------------|------------------|--------------|--------------------|
| <b>S4</b><br>Calcium spikes rheobase  | One-way ANOVA | $F_{(3, 60)} = 78.09,$<br>$P < 0.0001$                                                                                                                                                                       | Tukey's test            | Type I-Type II   | ****         | $P_{adj} < 0.0001$ |
|                                       |               |                                                                                                                                                                                                              |                         | Type I-Type III  | ****         | $P_{adj} < 0.0001$ |
|                                       |               |                                                                                                                                                                                                              |                         | Type I-Type IV   | ****         | $P_{adj} < 0.0001$ |
|                                       |               |                                                                                                                                                                                                              |                         | Type II-Type III | ns           | $P_{adj} = 0.2080$ |
|                                       |               |                                                                                                                                                                                                              |                         | Type II-Type IV  | ***          | $P_{adj} = 0.0003$ |
|                                       |               |                                                                                                                                                                                                              |                         | Type III-Type IV | ****         | $P_{adj} < 0.0001$ |
|                                       | Descriptive   | Type I ( $n = 16$ Purkinje): $47.88 \pm 1.151$<br>Type II ( $n = 20$ Purkinje): $21.45 \pm 2.091$<br>Type III ( $n = 20$ Purkinje): $25.55 \pm 1.175$<br>Type IV ( $n = 8$ Purkinje): $9.375 \pm 1.164$      |                         |                  |              |                    |
| <b>S4</b><br>Calcium spikes threshold | One-way ANOVA | $F_{(3, 60)} = 17.57,$<br>$P < 0.0001$                                                                                                                                                                       | Tukey's test            | Type I-Type II   | *            | $P_{adj} = 0.0303$ |
|                                       |               |                                                                                                                                                                                                              |                         | Type I-Type III  | **           | $P_{adj} = 0.0014$ |
|                                       |               |                                                                                                                                                                                                              |                         | Type I-Type IV   | ns           | $P_{adj} = 0.9045$ |
|                                       |               |                                                                                                                                                                                                              |                         | Type II-Type III | ****         | $P_{adj} < 0.0001$ |
|                                       |               |                                                                                                                                                                                                              |                         | Type II-Type IV  | ns           | $P_{adj} = 0.4001$ |
|                                       |               |                                                                                                                                                                                                              |                         | Type III-Type IV | **           | $P_{adj} = 0.0017$ |
|                                       | Descriptive   | Type I ( $n = 16$ Purkinje): $-17.04 \pm 1.225$<br>Type II ( $n = 20$ Purkinje): $-22.07 \pm 1.526$<br>Type III ( $n = 20$ Purkinje): $-10.14 \pm 0.6916$<br>Type IV ( $n = 8$ Purkinje): $-18.59 \pm 2.084$ |                         |                  |              |                    |
| <b>S4</b><br>Calcium spikes amplitude | One-way ANOVA | $F_{(3, 60)} = 3.605,$<br>$P = 0.0184$                                                                                                                                                                       | Tukey's test            | Type I-Type II   | ns           | $P_{adj} = 0.1047$ |
|                                       |               |                                                                                                                                                                                                              |                         | Type I-Type III  | ns           | $P_{adj} = 0.9513$ |
|                                       |               |                                                                                                                                                                                                              |                         | Type I-Type IV   | ns           | $P_{adj} = 0.9970$ |
|                                       |               |                                                                                                                                                                                                              |                         | Type II-Type III | *            | $P_{adj} = 0.0187$ |
|                                       |               |                                                                                                                                                                                                              |                         | Type II-Type IV  | ns           | $P_{adj} = 0.1748$ |
|                                       |               |                                                                                                                                                                                                              |                         | Type III-Type IV | ns           | $P_{adj} = 0.9964$ |
|                                       | Descriptive   | Type I ( $n = 16$ Purkinje): $14.37 \pm 0.6165$<br>Type II ( $n = 20$ Purkinje): $12.66 \pm 0.5126$<br>Type III ( $n = 20$ Purkinje): $14.76 \pm 0.4585$<br>Type IV ( $n = 8$ Purkinje): $14.56 \pm 0.5618$  |                         |                  |              |                    |
| <b>S4</b><br>Calcium spikes delay     | One-way ANOVA | $F_{(3, 60)} = 2.710$                                                                                                                                                                                        |                         |                  | ns           | $P = 0.053$        |
|                                       | Descriptive   | Type I ( $n = 16$ Purkinje): $1085 \pm 193.4$<br>Type II ( $n = 20$ Purkinje): $825.9 \pm 107.5$<br>Type III ( $n = 20$ Purkinje): $1391 \pm 189.5$<br>Type IV ( $n = 8$ Purkinje): $1471 \pm 255.9$         |                         |                  |              |                    |
| <b>S4</b><br>Calcium spikes frequency | One-way ANOVA | $F_{(3, 60)} = 55.61,$<br>$P < 0.0001$                                                                                                                                                                       | Tukey's test            | Type I-Type II   | ns           | $P_{adj} = 0.3629$ |
|                                       |               |                                                                                                                                                                                                              |                         | Type I-Type III  | ****         | $P_{adj} < 0.0001$ |
|                                       |               |                                                                                                                                                                                                              |                         | Type I-Type IV   | **           | $P_{adj} = 0.0013$ |
|                                       |               |                                                                                                                                                                                                              |                         | Type II-Type III | ****         | $P_{adj} < 0.0001$ |
|                                       |               |                                                                                                                                                                                                              |                         | Type II-Type IV  | *            | $P_{adj} = 0.0388$ |
|                                       |               |                                                                                                                                                                                                              |                         | Type III-Type IV | ****         | $P_{adj} < 0.0001$ |
|                                       | Descriptive   | Type I ( $n = 16$ Purkinje): $7.421 \pm 0.5361$<br>Type II ( $n = 20$ Purkinje): $6.555 \pm 0.4249$<br>Type III ( $n = 20$ Purkinje): $1.325 \pm 0.1488$<br>Type IV ( $n = 8$ Purkinje): $4.750 \pm 0.2018$  |                         |                  |              |                    |
| <b>S7C</b><br>Frequency               | Paired t-test | $t = 5.596, df = 6$ (Two-tailed)                                                                                                                                                                             | During - After swimming | **               | $P = 0.0014$ |                    |
|                                       | Descriptive   | During swimming ( $n = 7$ Purkinje): $4.508 \pm 0.811$<br>After swimming ( $n = 7$ Purkinje): $7.624 \pm 0.9576$                                                                                             |                         |                  |              |                    |
| <b>S7C</b><br>Amplitude               | Paired t-test | $t = 5.576, df = 6$ (Two-tailed)                                                                                                                                                                             | During - After swimming | **               | $P = 0.0014$ |                    |
|                                       | Descriptive   | During swimming ( $n = 4$ Purkinje): $1.217 \pm 0.218$<br>After swimming ( $n = 4$ Purkinje): $2.014 \pm 0.327$                                                                                              |                         |                  |              |                    |
| <b>S7D</b>                            | Descriptive   | $8.968 \pm 1.149$                                                                                                                                                                                            |                         |                  |              |                    |
